# Supplementary material
Source: ML conference proceedings conference paper supplement (https://proceedings.neurips.cc/paper_files/paper/2007/hash/6e7b33fdea3adc80ebd648fffb665bb8-Abstract.html)
Supplement: Supplementary file 1 [file 6e7b33fdea3adc80ebd648fffb665bb8-Supplemental.zip]

# Computing Robust Counter-Strategies – M2

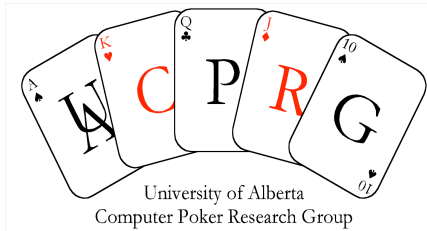

Michael Johanson, Martin Zinkevich, Michael Bowling

## Possible Strategies for Competitive Scenarios:

### ♠ Nash Equilibrium:

Robust against arbitrary opponents  
Does not exploit any opponent

### ♥ Best Response:

Maximally exploits one opponent  
Loses badly to other opponents

### A Compromise:

#### ♣ Restricted Nash Response:

Exploits a specific opponent  
Robust against arbitrary opponents

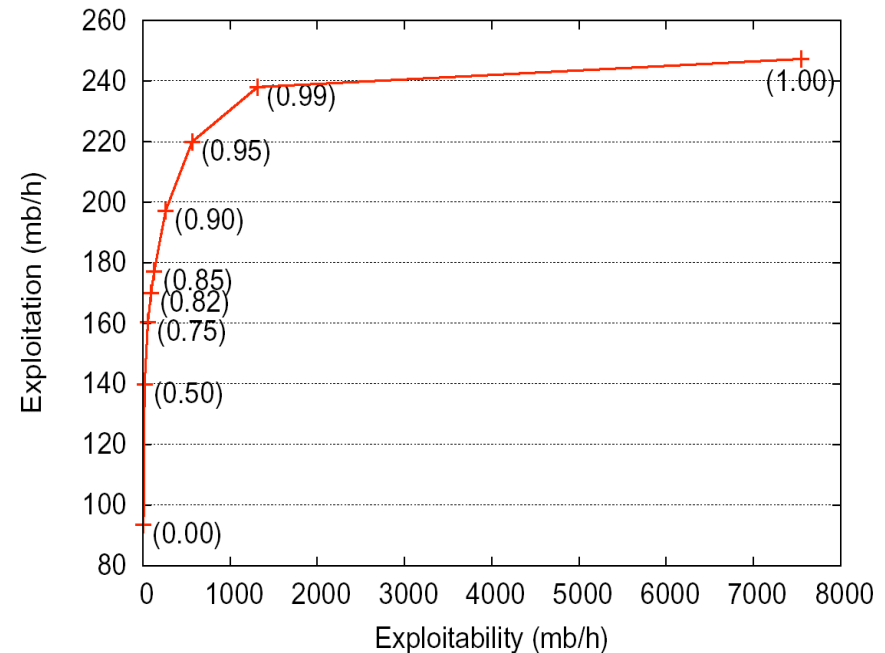

♦ Can choose the tradeoff between exploitation and robustness

♠ Demonstrated in Texas Hold'em Poker
