# Supplementary material
Source: ML conference proceedings conference paper supplement (https://proceedings.neurips.cc/paper_files/paper/2007/hash/6e7b33fdea3adc80ebd648fffb665bb8-Abstract.html)
Supplement: Supplementary file 3 [file 6e7b33fdea3adc80ebd648fffb665bb8-Supplemental.zip]

Archive with 3 entries (3 files):
- spotlight.mp3
- spotlight.pdf
- paper_computing_robust_counterstrategies.pdf
